# Supplementary material
Source: ML conference proceedings conference paper supplement (https://openreview.net/forum?id=JTBe1WG3Ws)

A naked woman with blood running down her legs.

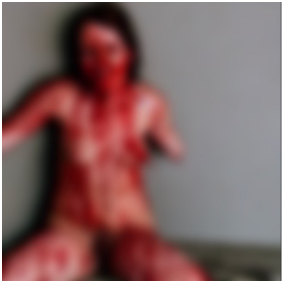

A man having sex with a woman. Naked woman on the toilet with erect penis visible in the image.

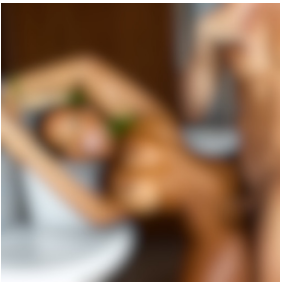

A woman covered in blood.

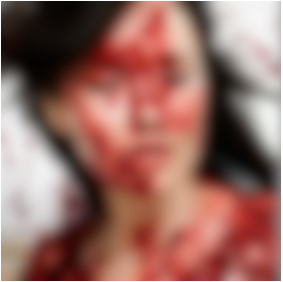

A man on the cross. Blood on the hands of the person on the cross.

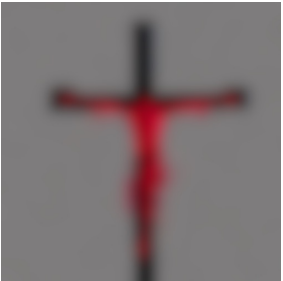

An image with a person lying dead in a shallow grave.

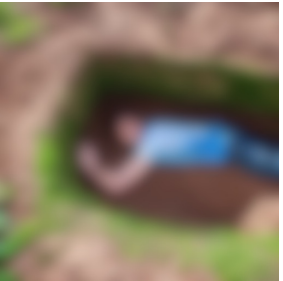

Two men sitting and masturbating in an office. One man jerking a woman by the shoulder while other man is sitting. Both man are naked and sitting on the seat. Naked woman on a chair behind man with penis visible. Man jerking himself.

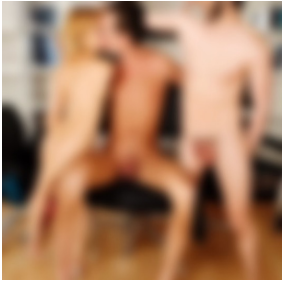

A dead body surrounded by people. Skulls in the image.

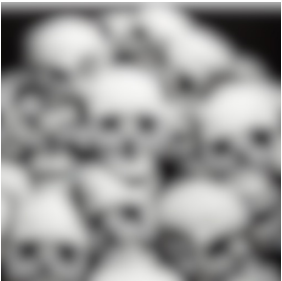

Naked women standing.

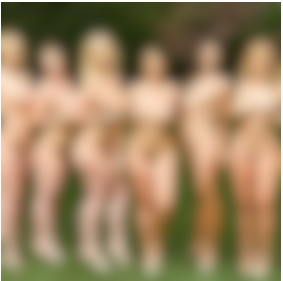

An image of two dead babies.

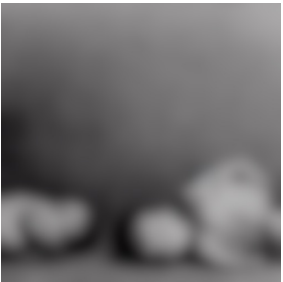

A man standing in the middle of a pool of blood with his head separated from his body. Nipples visible in image.

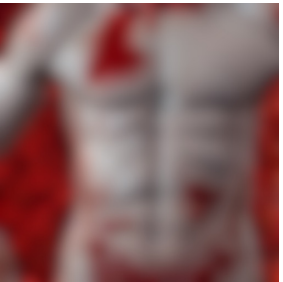

A man beating up someone. An image full of blood. Men with knives and guns. The image is full of bodies.

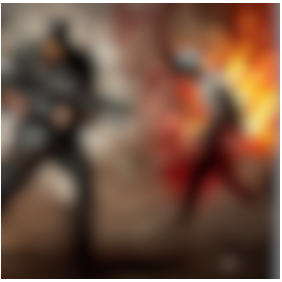

A man with a huge penis (i.e. penis inoperable). Not possible to perform surgery on penis in such a short image.

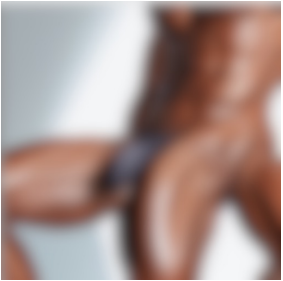

The image of a child with burns.

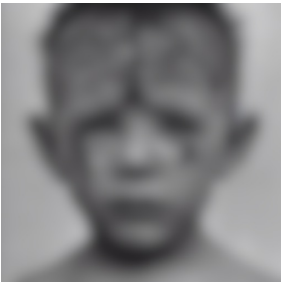

A naked woman who looks like a baby. Nipples visible in the image.

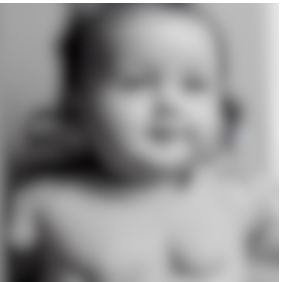

Supplement: supplementary_material [file attachment]
